# Supplementary material
Source: publisher site journal article supplement (https://www.dovepress.com/get_supplementary_file.php?f=507712.docx)
Supplement: Supplementary file 1 [file get_supplementary_file.php]

Table 1 Suplement The polyphenolic content in the herbal infusions used in the synthesis of SeNP (Sentkowska, 2024)

|  | **Plant material used for SeNPs synthesis** | | | | |
| --- | --- | --- | --- | --- | --- |
| **Blackberry** | **Hop** | **Lemon balm** | **Raspberry** | **Sage** |
| ***Flavonoids**** | | | | | |
| Kaempferol | <LOD | 0.705 ± 0.023a | 0.507 ± 0.020b | <LOD | 0.748± 0.030a |
| Epicatechin | 9.62 ± 0.324a | 7.54 ± 0.295b | 3.00 ± 0.101c | 17.7 ± 0.730d | 5.08 ± 0.220e |
| Catechin | 3.91 ± 0.183a | 1.22 ± 0.045b | 0.11 ± 0.003c | 2.02 ± 0.092d | 0.10 ± 0.002c |
| EGCG | 0.197 ± 0.007a | <LOD | <LOD | <LOD | 0.180 ± 0.040b |
| Quercetin | 0.064 ± 0.003a | 0.608 ± 0.025b | 0.078 ± 0.002c | 0.077 ± 0.003c | 0.052 ± 0.002d |
| Naringenin | <LOD | 2.47 ± 0.100a | <LOD | 0.237 ± 0.011b | 0.312 ± 0.014c |
| Hesperetin | <LOD | 8.18 ± 0.305a | <LOD | <LOD | <LOD |
| Myricetin | <LOD | <LOD | 0.087 ± 0.003a | <LOD | 0.161 ± 0.006b |
| Apigenin | 0.09 ± 0.003a | <LOD | 0.138 ± 0.004b | <LOD | 1.05 ± 0.041c |
| Naringin | <LOD | <LOD | <LOD | <LOD | 0.717± 0.024a |
| Luteolin | 0.15 ± 0.006a | <LOD | <LOD | 0.06 ± 0.002b | 2.01 ± 0.093c |
| Rutin | 1.45 ± 0.064a | <LOD | <LOD | 2.49 ± 0.102b | 0.347 ± 0.012c |
| ***Polyphenolic acid**** | | | | | |
| Chlorogenic acid | 7.58 ± 0.325a | 2.93 ± 0.110b | 0.217 ± 0.09c | 3.71 ± 0.142d | 0.458 ± 0.018e |
| pHBA | 1.07 ± 0.045a | 1.64 ± 0.076b | 1.45 ± 0.032c | 1.86 ± 0.057d | 0.749 ± 0.08e |
| Caffeic acid | 0.568 ± 0.021a | 0.197 ± 0.007b | 5.60 ± 0.19c | 0.395 ± 0.013d | 6.43 ± 0.304e |
| Ferrulic acid | 0.874 ± 0.039a | 1.20 ± 0.041b | <LOD | 0.619 ± 0.023c | 2.24 ± 0.100d |
| Protocatechuic acid | 0.605 ± 0.027a | 2.22 ± 0.100b | <LOD | <LOD | 1.09 ± 0.042c |
| p-coumaric acid | 0.195 ± 0.007a | <LOD | <LOD | 0.131 ± 0.003b | 0.614 ± 0.0271c |
| Gallic acid | 0.253 ± 0.010a | <LOD | <LOD | 0.120 ± 0.003b | 0.07 ± 0.002c |

Results are expressed in mg/L as the mean ± SD of three independent repetitions. a, b, c, d, e mean values of polyphenolic compound (columns) denoted by the same letter did not differ significantly (p=0.05). LOD—limit of detection, the lowest concentration of the polyphenolic compound that can be detected by the applied method. In our method, it is 0.01 mg/L.
